# Supplementary material for: Musical Creativity “Revealed” in Brain Structure: Interplay between Motor, Default Mode, and Limbic Networks
Source: PubMed Central journal article supplement (PMC4757893; doi:10.1038/srep20482), 2016-02-18
Supplement: srep20482-s1.pdf [file srep20482-s1.pdf]

**MUSICAL CREATIVITY “REVEALED” IN BRAIN STRUCTURE: INTERPLAY  
BETWEEN MOTOR, DEFAULT MODE, AND LIMBIC NETWORKS**

David M. Bashwiner  
Christopher J. Wertz  
Ranee A. Flores  
Rex E. Jung

SUPPLEMENTARY MATERIALS

## MUSICAL CREATIVITY QUESTIONNAIRE

### I. Musical Background

Have you ever practiced a musical instrument? Circle one option. (Please include “voice” as an instrument if you are a singer.)

|              |               |                |               |              |                          |
|--------------|---------------|----------------|---------------|--------------|--------------------------|
| 1            | 2             | 3              | 4             | 5            | 6                        |
| <i>Never</i> | <i>Rarely</i> | <i>Monthly</i> | <i>Weekly</i> | <i>Daily</i> | <i>Several Hours/Day</i> |

If 5 or 6, please indicate for each instrument:

- a. The instrument played;
- b. The number of years you played the instrument on a daily or almost daily basis;
- c. The number of hours you practiced/played the instrument per day *averaged over the whole duration of the period indicated in (b)*;
- d. Whether study was predominantly formal (with a teacher), informal (for example, learning from recordings, self study from books, playing in a rock band), or an equal amount of both;
- e. Whether such study predominantly involved reading music, playing by ear, or an equal amount of both.

| (a)<br>Instrument | (b)<br>Years Played<br>(Daily Basis) | (c)<br>Average Number<br>Hours Played | (d)<br>Formality of Study<br>(check one box only) |          |                 | (e)<br>Reading Music vs. Playing by Ear<br>(check one box only) |                |                 |
|-------------------|--------------------------------------|---------------------------------------|---------------------------------------------------|----------|-----------------|-----------------------------------------------------------------|----------------|-----------------|
|                   |                                      |                                       | Formal                                            | Informal | Equal Amt. Both | Reading Music                                                   | Playing by Ear | Equal Amt. Both |
| 1.                |                                      |                                       |                                                   |          |                 |                                                                 |                |                 |
| 2.                |                                      |                                       |                                                   |          |                 |                                                                 |                |                 |
| 3.                |                                      |                                       |                                                   |          |                 |                                                                 |                |                 |
| 4.                |                                      |                                       |                                                   |          |                 |                                                                 |                |                 |
| 5.                |                                      |                                       |                                                   |          |                 |                                                                 |                |                 |
| 6.                |                                      |                                       |                                                   |          |                 |                                                                 |                |                 |
| 7.                |                                      |                                       |                                                   |          |                 |                                                                 |                |                 |

### II. Creative Musical Achievement

Place a check mark beside sentences that apply to you. For “recordings,” consider both professional and semi-professional.

- \_\_\_\_\_ I have composed an original piece of music.
- \_\_\_\_\_ An original piece of music that I have composed has been published or recorded.
- \_\_\_\_\_ I have performed on a recording of someone else’s composition.
- \_\_\_\_\_ I have performed on a recording of my own composition.
- \_\_\_\_\_ Recordings of my composition have been sold publicly.
- \_\_\_\_\_ My musical talent has been critiqued in a local publication.
- \_\_\_\_\_ My compositions have been critiqued in a national publication.
